# Supplementary material for: Highly stable Au nanoparticles with double hydrophilic block copolymer templates: correlation between structure and stability
Source: Royal Society of Chemistry journal article supplement (doi:10.1039/c7py00773f), 2017-01-01
Supplement: c7py00773f1.pdf [file c7py00773f1.pdf]

# Highly Stable Au Nanoparticles with Double Hydrophilic Block Copolymer Templatation: Correlation between Structure and Stability

*Eunyong Seo,<sup>1†</sup> Sang-Ho Lee,<sup>2†</sup> Sangho Lee,<sup>3</sup> Soo-Hyung Choi,<sup>3</sup> Craig J. Hawker,<sup>2</sup> and Byeong-Su  
Kim<sup>1,4\*</sup>*

<sup>1</sup>Department of Energy Engineering, Ulsan National Institute of Science and Technology (UNIST),  
Ulsan 44919, Korea

<sup>2</sup>Materials Research Laboratory and Departments of Materials, Chemistry and Biochemistry,  
University of California, Santa Barbara, California 93106, United States

<sup>3</sup>Department of Chemical Engineering, Hongik University, Seoul 04066, Korea

<sup>4</sup>Department of Chemistry, Ulsan National Institute of Science and Technology (UNIST),  
Ulsan 44919, Korea

<sup>†</sup>These authors contributed equally to this work.

E-mail: bskim19@unist.ac.kr

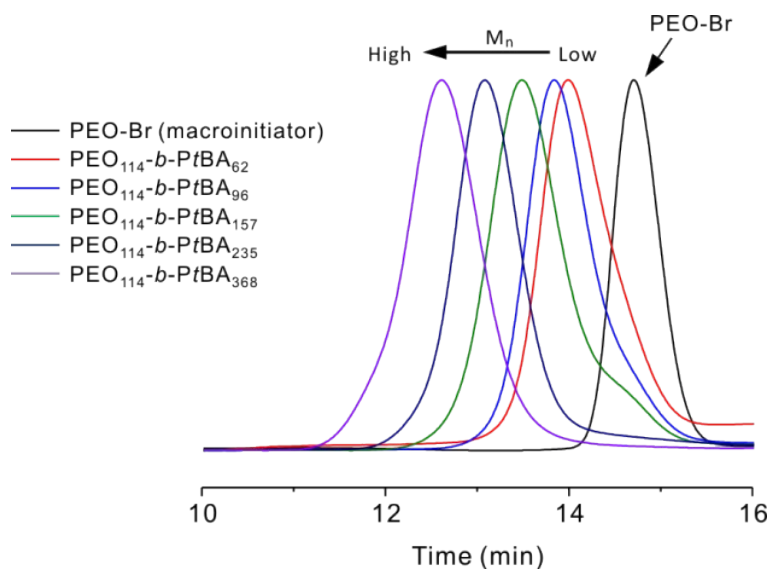

**Figure S1.** SEC traces of PEO macroinitiator and PEO-*b*-PtBA copolymers under GPC analysis in chloroform. The molecular weight and molecular weight distribution was determined by using PMMA as a standard.

**Table S1.** Characterization of micelles and Au NPs modified by the PEO<sub>5k</sub>-*b*-PAA<sub>7k</sub> copolymer.

| $R^a$                      | 0.5             | 1.0             | 1.5            | 2.0            | 3.0            | 4.0            |
|----------------------------|-----------------|-----------------|----------------|----------------|----------------|----------------|
| $D_h$ (nm) <sup>b</sup>    | 56.6            | 75.7            | 100.6          | 101.1          | 112.4          | 97.5           |
| $D_{NP}$ (nm) <sup>c</sup> | $44.7 \pm 11.7$ | $37.6 \pm 15.3$ | $25.9 \pm 8.7$ | $21.3 \pm 8.1$ | $16.7 \pm 3.3$ | $17.8 \pm 2.3$ |

<sup>a</sup>The ratio of acrylic acid (AA) in the copolymer to Au precursor is denoted as  $R$ . <sup>b</sup>Averaged size of micelles is denoted as  $D_h$ , which was evaluated from the three measurements by DLS. <sup>c</sup>Diameter of Au NP is denoted as  $D_{NP}$ , which was calculated by analyzing more than 100 Au NPs observed in TEM images.

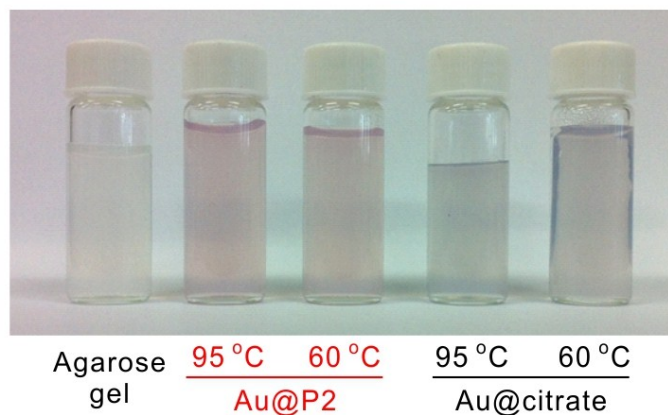

**Figure S2.** Thermal dispersibility of Au@P2 and Au@citrate NPs in agarose gel matrix. The particle concentration of Au NPs in each gel was fixed to 0.10 nM.

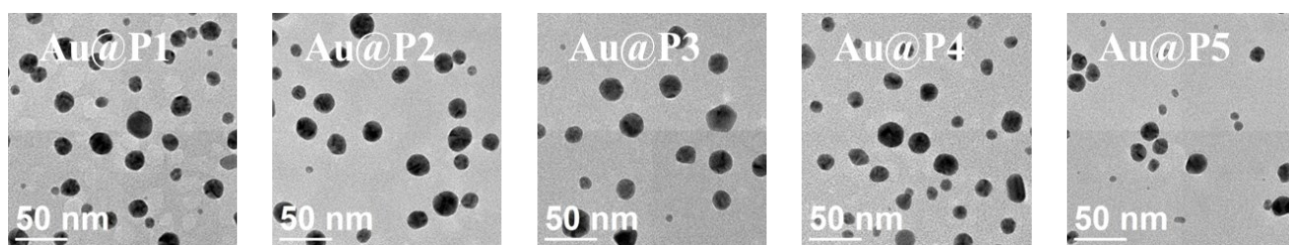

**Figure S3.** TEM images of a series of Au@DHBC NPs prepared at  $R = 3$ .

**Table S2.** Theoretical and yield of Au and DHBC.

| Entry | Composition                                      | $M_n$ , NMR,<br>(PEO- <i>b</i> -PAA) | Theoretical<br>mass <sup>a</sup> |              | Au yield     |             | DHBC yield   |             |
|-------|--------------------------------------------------|--------------------------------------|----------------------------------|--------------|--------------|-------------|--------------|-------------|
|       |                                                  |                                      | Au<br>(mg)                       | DHBC<br>(mg) | Mass<br>(mg) | Mass<br>(%) | Mass<br>(mg) | Mass<br>(%) |
| Au@P1 | PEO <sub>5k</sub> - <i>b</i> -PAA <sub>5k</sub>  | 9600                                 | 13.2                             | 30.5         | 12.3         | 93.3        | 29.8         | 97.8        |
| Au@P2 | PEO <sub>5k</sub> - <i>b</i> -PAA <sub>7k</sub>  | 12100                                | 13.2                             | 24.8         | 12.3         | 93.3        | 19.5         | 78.7        |
| Au@P3 | PEO <sub>5k</sub> - <i>b</i> -PAA <sub>11k</sub> | 16500                                | 13.2                             | 20.8         | 12.0         | 91.2        | 16.1         | 77.2        |
| Au@P4 | PEO <sub>5k</sub> - <i>b</i> -PAA <sub>17k</sub> | 22100                                | 13.2                             | 18.7         | 12.0         | 91.2        | 15.0         | 80.3        |
| Au@P5 | PEO <sub>5k</sub> - <i>b</i> -PAA <sub>27k</sub> | 31700                                | 13.2                             | 17.1         | 11.8         | 89.4        | 13.6         | 79.4        |

<sup>a</sup> The theoretical mass of Au and DHBC equals the value used in the synthesis of NP. <sup>b</sup> The yield of Au NPs was calculated by ICP-OES analysis. <sup>c</sup> The mass of DHBC = [The ratio of weight% of polymer to weight% of Au (based on the TGA analysis)] × [mass of Au].

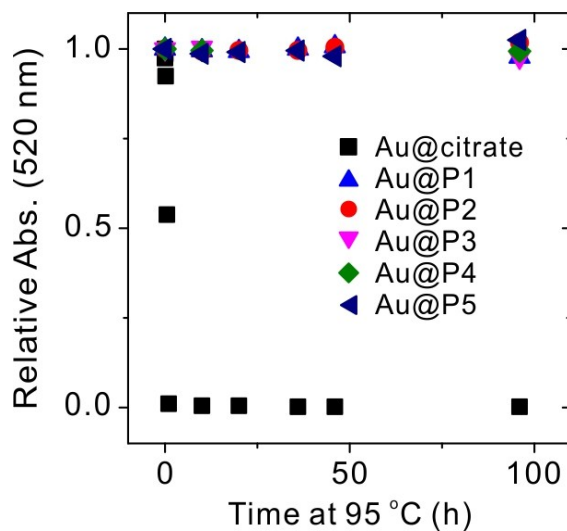**Figure S4.** Thermal stability of Au@citrate and Au@DHBC NPs at 95 °C.
